# Supplementary material for: Evaluation of Real-life Use of Point-of-care Rapid Antigen Testing for SARS-CoV-2 in Schools (EPOCRATES): a cohort study
Source: PubMed Central journal article supplement — CMAJ Open. 2022 Dec 6;10(4):E1027–33. doi: 10.9778/cmajo.20210327 (PMC9744263; doi:10.9778/cmajo.20210327), 2022-12-06
Supplement: open-2021-0327-original-submission.pdf [file open-2021-0327-original-submission.pdf]

## Evaluation of real-life use of Point-Of-Care Rapid Antigen Testing for SARS-CoV-2 in schools (EPOCRATES)

Ana C. Blanchard, MD MSc<sup>1</sup>, Marc Desforges, PhD<sup>2,3</sup>, Annie-Claude Labbé, MD<sup>3,4</sup>, Cat Tuong Nguyen, MD, PhD<sup>5</sup>, Yves Petit, MSc<sup>6</sup>, Dominic Besner, BEd<sup>7</sup>, Kate Zinszer, PhD<sup>8</sup>, Olivier Séguin, PhD<sup>5</sup>, Zineb Laghdir, MSc<sup>9</sup>, Kelsey Adams, MScPH<sup>9</sup>, Marie-Ève Benoit, MSc<sup>9</sup>, Geneviève Leduc<sup>9</sup>, Jean Longtin, MD<sup>10</sup>, Ioannis Ragoussis, PhD<sup>11</sup>, David L. Buckeridge, MD PhD<sup>12</sup>, Caroline Quach, MD MSc<sup>2,3</sup>

**Affiliations:** <sup>1</sup>Division of Infectious Diseases, Department of Pediatrics, CHU Sainte-Justine, Université de Montréal, Montréal (QC), Canada. <sup>2</sup> Clinical Department of Laboratory Medicine, CHU Sainte-Justine, Montréal (QC), Canada. <sup>3</sup> Department of Microbiology, Infectious Diseases and Immunology, Université de Montréal, Montréal (QC), Canada. <sup>4</sup>Division of Infectious Diseases, Department of Medicine, Centre intégré universitaire de santé et de services sociaux (CIUSSS) de l'Est-de-l'Île-de-Montréal, Montréal (QC), Canada. <sup>5</sup>Direction régionale de santé publique, CIUSSS du Centre-Sud-de-l'île-de-Montréal, Montréal (QC), Canada. <sup>6</sup>Pensionnat du Saint-Nom-de-Marie, Montréal (QC), Canada. <sup>7</sup>École secondaire Calixa-Lavallée, Montréal (QC), Canada. <sup>8</sup>École de santé publique de l'Université de Montréal, Université de Montréal, Montréal, Quebec. <sup>9</sup>Research Center, CHU Sainte-Justine, Montréal (QC), Canada. <sup>10</sup>Clinical Department of Laboratory Medicine, CHU de Québec, Québec City, Quebec. <sup>11</sup>McGill Genome Center, McGill University, Montréal (QC), Canada. <sup>12</sup>Department of Epidemiology, Biostatistics and Occupational Health, McGill University, Montréal (QC), Canada

**Address correspondence to:** Caroline Quach, Department of Microbiology, CHU Sainte-Justine 3175 Chemin de la Côte-Sainte-Catherine, Montréal, Quebec, Canada, H3T 1C5 [c.quach@umontreal.ca](mailto:c.quach@umontreal.ca)

**Short title:** Rapid antigen testing for SARS-CoV-2 in schools

**Conflict of Interest Disclosures:** The authors declare that they have no known competing financial interests or personal relationships that could have appeared to influence the work reported in this paper.

**Funding:** Québec Ministry of Health and Social Services

**Role of Funder:** The study sponsor did not have a role in study design, in interpretation of data, writing of the report or decision to submit the paper for publication.

**Abbreviations:** ABM (agent-based model), Ct (cycle threshold), COVID-19 (Coronavirus disease 2019), D (day), ESCL (École Secondaire Calixa-Lavallée), LOD (limit of detection), PCR (polymerase chain reaction), PSNM (Pensionnat du Saint-Nom-de-Marie), RADT (rapid antigen detection test), SARS-CoV-2 (Severe acute respiratory syndrome coronavirus 2), TAT (turnaround time)

1  
2  
3 **Table of Contents Summary:** Rapid antigen tests were compared to standard PCR to diagnose  
4 SARS-CoV-2 infections in high-school students. They performed better in symptomatic  
5 individuals.  
6

7  
8 **What’s Known on This Subject**

9 Rapid antigen detection tests (RADT) are often used to diagnose respiratory pathogens at the point-  
10 of-care. Their performance characteristics vary, but they usually have high specificity and  
11 moderate sensitivity compared with PCR.  
12

13  
14 **What This Study Adds**

15 RADT sensitivity ranged from 28.6% in asymptomatic individuals to 83.3% in symptomatic  
16 individuals. Return to school after 7 days of quarantine was safe in exposed students. Secondary  
17 cases were identified in 28% of classes with an index case.  
18  
19  
20  
21  
22  
23  
24  
25  
26  
27  
28  
29  
30  
31  
32  
33  
34  
35  
36  
37  
38  
39  
40  
41  
42  
43  
44  
45  
46  
47  
48  
49  
50  
51  
52  
53  
54  
55  
56  
57  
58  
59  
60

Confidential

1  
2  
3 **Authors contribution statement:**  
4

5 Caroline Quach conceptualized and designed the study, acquired funding, carried out the data  
6 analysis and drafted the initial manuscript.  
7

8  
9 Marc Desforges, Annie-Claude Labbé, Cat Tuong Nguyen, Kate Zinszer, Jean Longtin, Ioannis  
10 Ragoussis and David L. Buckeridge conceptualized and designed the study.  
11

12 Kelsey Adams, Marie-Ève Benoit collected data and managed and coordinated the research  
13 project on site.  
14

15  
16 Yves Petit, Dominic Besner, Zineb Laghdir, Geneviève Leduc managed and coordinated the  
17 research project on site.  
18

19 Ana C. Blanchard carried out the data analysis and drafted the initial manuscript.  
20

21 Olivier Séguin carried out the data analysis.  
22

23  
24 All authors critically reviewed, revised the manuscript and approved the final manuscript as  
25 submitted and agree to be accountable for all aspects of the work.  
26  
27  
28  
29  
30  
31  
32  
33  
34  
35  
36  
37  
38  
39  
40  
41  
42  
43  
44  
45  
46  
47  
48  
49  
50  
51  
52  
53  
54  
55  
56  
57  
58  
59  
60

Confidential

1  
2  
3 **Abstract (246 words)**  
4  
5

6 **Background:** We evaluated the use of rapid antigen detection tests (RADT) for the diagnosis of  
7 severe acute respiratory syndrome coronavirus 2 (SARS-CoV-2) infection in school settings to  
8 determine RADT's performance compared to PCR.

9 **Methods:** In this real-world, prospective observational cohort study, high-school students and  
10 staff were recruited from two high-schools in Montreal (Canada) and followed from January 25<sup>th</sup>  
11 to June 10<sup>th</sup>, 2021. Twenty-five percent of asymptomatic participants were tested weekly by  
12 RADT (nasal) and PCR (gargle). Class contacts of cases were tested. Symptomatic participants  
13 were tested by RADT (nasal) and PCR (nasal and gargle). The number of cases and outbreaks  
14 were compared to other high schools in the same area.

15 **Results:** Overall, 2,099 students and 286 school staff members consented to participate. The  
16 overall RADT's specificity varied from 99.8 to 100%, with a lower sensitivity, varying from  
17 28.6% in asymptomatic to 83.3% in symptomatic participants. Secondary cases were identified  
18 in 10 of 35 classes. Returning students to school after a 7-day quarantine, with a negative PCR  
19 on D6-7 after exposure, did not lead to subsequent outbreaks. Of cases for whom the source was  
20 known, 37 of 57 (72.5%) were secondary to household transmission, 13 (25%) to intra-school  
21 transmission and one to community contacts between students in the same school.

22 **Conclusion:** RADT did not perform well as a screening tool in asymptomatic individuals.  
23 Reinforcing policies for symptom screening when entering schools and testing symptomatic  
24 individuals with RADT on the spot may avoid subsequent significant exposures in class.  
25  
26  
27  
28  
29  
30  
31  
32  
33  
34  
35  
36  
37  
38  
39  
40  
41  
42  
43  
44  
45  
46  
47  
48  
49  
50  
51  
52  
53  
54  
55  
56  
57  
58  
59  
60

## 24 **Background**

25  
26 Timely diagnosis of infection enables outbreak control through rapid isolation of index cases and  
27 subsequent contact tracing<sup>1, 2</sup>. Diagnosis of severe acute respiratory syndrome coronavirus 2  
28 (SARS-CoV-2) infection is predominantly based on polymerase chain reaction (PCR) testing,  
29 which has a turnaround time (TAT) of 24-48 hours. Rapid antigen detection tests (RADT) were  
30 used for years to diagnose other respiratory pathogens, such as influenza and respiratory syncytial  
31 virus. RADT are inexpensive and can be used at the point-of-care. They usually have high  
32 specificity and moderate sensitivity compared with PCR<sup>3-6</sup>. Given their rapid TAT, RADT allow  
33 for efficient triage, management and cohorting of exposed individuals<sup>7</sup>. The potential use of RADT  
34 is especially relevant in school settings, where COVID-19 outbreaks can interrupt in-person  
35 teaching, contribute to social isolation and negatively impact learning<sup>8-11</sup>.

36  
37 RADT perform best in the early stages of infection, when viral load is generally high<sup>12-15</sup> and may  
38 help in situations where a person was exposed to a confirmed case of COVID-19. Reported RADT  
39 sensitivity ranges from 28.9% to 98.3%, with improved RADT sensitivity in samples with high  
40 viral loads and in symptomatic individuals, with a specificity of 99.5%<sup>16, 17</sup>. PCRs' usual limits of  
41 detection (LOD) is 600-1000 viral RNA copies/ml, whereas RADTs usually have LOD 2-3 logs  
42 higher ( $10^5$  to  $10^6$ )<sup>18</sup>. Many studies have indicated the importance of high viral load dynamics  
43 with infectiousness and transmissibility<sup>19, 20</sup>. There is a strong correlation between cycle threshold  
44 (Ct) values and the ability to recover infectious virus and thus transmissibility: for each unit  
45 increase in Ct value, the odds of recovering infectious virus decreased by 0.67 being under 10%  
46 when Ct-values were  $> 35$ . Ct values of 17 to 32 corresponded to  $10^5$  and  $10^1$  SARS-CoV-2 RNA  
47 copies/ $\mu$ L, respectively<sup>21</sup>.

1  
2  
3 48  
4  
5 49 Children being the last group to be fully immunised, we aimed: 1) to determine the performance  
6  
7 50 characteristics of RADT for SARS-CoV-2 compared to PCR in different groups of high-school  
8  
9 51 students and staff and 2) to determine if serial testing of close COVID-19 contacts would allow  
10  
11 52 for a safe and faster return to school.  
12  
13  
14  
15 53

## 16 17 54 **Methods**

### 18 19 55 *Participating population*

20  
21 56 The study was conducted in two high schools (Montreal, Canada), of ~3000 students. Pensionnat  
22  
23 57 du Saint-Nom-de-Marie (PSNM) is a private school in an affluent neighbourhood, with 80% of  
24  
25 58 students from native-born families. École secondaire Calixa-Lavallée (ESCL) is a public school  
26  
27 59 where students are predominantly from multiethnic, first-generation immigrant communities. Both  
28  
29 60 schools followed the Ministry of Education recommendations during the COVID-19 pandemic, by  
30  
31 61 forming “classroom bubbles” and providing in-person teaching, except for classes in secondary 3  
32  
33 62 to 5 (grades 9-11) that stayed home every other day. Masks were mandatory at all times, as of  
34  
35 63 October 8<sup>th</sup>, 2020. Students, were ~30 per class and were seated one metre (three feet) from each  
36  
37 64 other. They remained in the same classroom and teachers moved from one class to the next. School  
38  
39 65 staff, including teachers and administrative personnel, were invited to participate. A first dose of  
40  
41 66 COVID-19 vaccine was offered to staff members as of April 9<sup>th</sup>, 2021, and to students  $\geq 12$  years  
42  
43 67 as of May 25<sup>th</sup>, 2021.  
44  
45  
46  
47  
48  
49  
50  
51  
52  
53  
54 70  
55  
56  
57  
58  
59  
60

1  
2  
3 71 *Study design and interventions*  
4

5 72 This was a real-world, prospective observational cohort study comparing RADT to PCR. Subjects  
6  
7  
8 73 were high-school students and staff from two schools followed from January 25<sup>th</sup> to June 10<sup>th</sup>,  
9  
10 74 2021.  
11

12 75  
13  
14 76 The RADT used was a lateral flow immunoassay [PanBio™ COVID-19 Ag test (Abbott  
15  
16  
17 77 Laboratories, Illinois, USA)], authorised by Health Canada<sup>22</sup>. Nasal swabs were self-collected  
18  
19 78 under the supervision of a research assistant who performed RADT on site. For symptomatic  
20  
21 79 participants, the remaining buffer fluid after RADT was done was sent for PCR. In addition, spring  
22  
23 80 water gargle specimens were collected for PCR testing<sup>23</sup>. Laboratory-developed PCR was  
24  
25 81 performed in the CHU Sainte-Justine virology laboratory (Montreal, Canada), with a LOD of 400  
26  
27 82 copies/mL (based on Corman et al.<sup>24</sup>). Extraction and purification of genetic material (nasal and  
28  
29 83 gargle specimens) was done with Roche's MagNA Pure 96 system. The laboratory testing protocol  
30  
31 84 and the water gargle validation have been described elsewhere<sup>25-28</sup>.  
32  
33  
34  
35  
36  
37

38 86 Decisions about management of cases and contacts were made by two members of the research  
39  
40 87 team (AB, CQ), in collaboration with local public health (CT, OS), based on RADT and PCR  
41  
42 88 results and history of exposures. The school principals (YP, DB) were actively involved in the  
43  
44 89 study design and organisation throughout the study period.  
45  
46

47 90 1) Testing protocol in the absence of a known exposure:  
48

49 91 a. Asymptomatic students and staff: Nasal swabs and gargle specimens on a random  
50  
51 92 sample of 25% of participants were collected weekly for RADT (nasal) and PCR  
52  
53 93 (gargle), stratified by class.  
54  
55  
56  
57  
58  
59  
60

1  
2  
3 94 b. Symptomatic students and staff: Gargle specimens for PCR and a nasal swab for RADT  
4  
5 95 and PCR were performed on site. Results from RADT and PCR were officially reported  
6  
7 96 to public health; an individual was considered infected if the PCR result was positive.  
8  
9  
10 97 If symptoms occurred while in school, the research team proceeded with sample  
11  
12 98 procurement. If symptoms developed while at home, the participant could either get  
13  
14 99 tested through the usual process of care or through a walkthrough process at school (by  
15  
16  
17 100 appointment, in a specific room away from public areas).  
18  
19 101

20  
21  
22 102 2) Management of exposed contacts of a positive individual in a class

23  
24 103 Students and staff who were considered contacts of a confirmed COVID-19 positive individual  
25  
26 104 were isolated at home. Students were allocated to either a 7- or 14-day quarantine, staffs were  
27  
28 105 allocated to a 7-day quarantine, with tests (nasal RADT and gargle PCR) three days after last  
29  
30  
31 106 contact with the known positive case, and up to two days before the end of quarantine. RADT was  
32  
33 107 performed in school on day (D)14, D21 and D28, if the initial PCR was negative. If symptoms  
34  
35 108 developed, both the RADT and PCR were performed, as previously described. Students who did  
36  
37  
38 109 not consent to the study were quarantined for 14 days, even if their group was allocated to a 7-day  
39  
40 110 quarantine. Students and staff concerned with significant off-campus exposure were provided to  
41  
42 111 be tested through the project.  
43  
44 112

45  
46  
47 113 *Outcomes*

48  
49 114 The primary outcome was to assess the performance characteristics of RADT in: a) asymptomatic  
50  
51 115 participants randomly screened (compared to gargle PCR); b) asymptomatic close contacts of a  
52  
53  
54  
55  
56  
57  
58  
59  
60



1  
2  
3 116 confirmed positive case (compared to PCR on nasal swab and gargle); c) symptomatic participants  
4  
5 117 (compared to PCR on nasal swab and gargle).  
6  
7

8 118  
9  
10 119 Secondary outcomes included: a) number of positive students by RADT in groups exposed to a  
11  
12 120 confirmed positive index case, allocated to early (on D8) versus standard (on D15) return to school  
13  
14 121 (7 vs. 14 days of quarantine) and b) number of case clusters in schools. These clusters were  
15  
16 122 compared to clusters in other high schools in Montreal during the same time frame, using public  
17  
18 123 health data.  
19  
20

21 124

22  
23  
24 125 *Statistical analysis*

25  
26 126 Descriptive statistics were used for characteristics of the cohort and test performance (sensitivity  
27  
28 127 and specificity) of the RADT.  
29  
30

31 128

32  
33 129 To determine the precision with which we would be able to estimate our primary outcome, we  
34  
35 130 implemented an agent-based model (ABM) to estimate it through simulations, adapting a  
36  
37 131 previously described school-based ABM<sup>29</sup> (Supplementary Appendix A). Based on this  
38  
39 132 simulation, we expected that the number of infections and tests would be sufficient in one school  
40  
41 133 but added an additional school to support generalizability of the findings, as well as to allow  
42  
43 134 exploration of secondary objectives.  
44  
45

46 135

47  
48  
49 136 *Ethical considerations*

50  
51 137 This project was approved by the CHU Ste-Justine Research Ethics Board (#MP-21-2021-3271).  
52  
53 138 Written invitation letters to participate in the study were sent by schools' direction to parents and  
54  
55  
56  
57  
58  
59  
60

1  
2  
3 139 staff explaining the study objectives, methods and expected impacts. Online informed parental  
4  
5 140 consent, as well as assent, was required for all students. Parents who preferred to keep their  
6  
7 141 children home for 14 days in case of a class contact could do so. Tests results were communicated  
8  
9 142 to parents and students (aged  $\geq 14$  years) by the school (via email), as they became available.  
10  
11  
12  
13

143

14 144 This study was funded by the Québec Ministry of Health and Social Services.  
15  
16  
17

145

146

## 147 **Results**

148 During the study period, 2,099 students and 286 school staff members consented to participate.

149 Overall, the participation rate for students was 78.5% and 63.5% (Figure 1) and 94.4% and 89.5%  
150 for staff members.

151

### 152 *RADT results and PCR validation (from gargle specimens only)*

#### 153 1) Asymptomatic students and staff

154 Of 5,583 RADT done on asymptomatic students (Table 1), seven had an invalid PCR result on the  
155 gargle sample, seven were equivocal and three were weak positive, of which one was negative  
156 when repeated the next day (and was excluded). Two students with equivocal or weak positive  
157 PCR results had a positive PCR result in the previous 90 days. The infection prevalence in  
158 asymptomatic participants was 0.30% (95% CI 0.18- 0.49). Therefore, the sensitivity of RADT in  
159 that population was 41.2% (95% CI 21.6-64.0), with a specificity of 100.0%.

160 Of 784 asymptomatic RADT screening tests done on asymptomatic randomly screened staff  
161 members, two gave invalid PCR results and six were lost. Only one RADT was positive, but the

1  
2  
3 162 PCR was negative on both the gargle and nasal specimens, giving a specificity of 99.8% (95% CI  
4  
5 163 99.3-100.0) (Table 1).  
6

7  
8 164 2) Asymptomatic exposed contacts in a classroom  
9

10 165 A total of 1491 RADT tests and PCR were done on asymptomatic students exposed to a positive  
11  
12 166 classmate index case at D3 and 2 days before returning to class. After excluding one equivocal  
13  
14 167 PCR result, SARS-CoV-2 prevalence in this exposed group was 0.7% (95% CI 0.5-1.6). The  
15  
16 168 sensitivity of RADT was 28.6% (95% CI 8.4-58.1) with a specificity of 99.6% (95% CI 99.1-99.9)  
17  
18 169 (Table 1). Of 627 RADTs done for asymptomatic exposed contacts on D14, D21 and D28, only  
19  
20 170 one was positive (also positive by PCR when tested on D12 – see outbreak section). A total of 61  
21  
22 171 RADT and PCRs were done for staff members on D3 and D7 after a contact with a positive index  
23  
24 172 case in school (Table 1). All tests were negative.  
25  
26

27  
28 173 3) Symptomatic students and staff  
29

30 174 Overall, 235 students developed symptoms and were tested on site for SARS-CoV-2. As shown in  
31  
32 175 Table 1, 10 had a positive RADT and 12 had a positive PCR [prevalence=5.1% (95% CI 2.7-8.7)].  
33  
34 176 The sensitivity of RADT in that population was 83.3% (95% CI 51.6-97.9) with a specificity of  
35  
36 177 100.0% (95% CI 98.4-100.0). Sixty-four staff members were tested on site for symptoms  
37  
38 178 compatible with COVID-19. Only one had a positive RADT and PCR. In addition, one positive  
39  
40 179 case was identified by PCR after a negative RADT (sensitivity of 50% (95% CI 1,3- =98,7) and  
41  
42 180 specificity of 100%.  
43  
44  
45  
46

47 181

48  
49 182

50  
51 183

52  
53 184  
54  
55  
56  
57  
58  
59  
60

1  
2  
3 185 *Outbreaks and comparison with other schools in the region*  
4

5 186 Of all participants, 76 PCR (gargle or nasal) positive cases were identified, including three cases  
6  
7 187 in staff members. Of the 35 classes included in the study, 20 returned on D8 after contact, if the  
8  
9 188 gargle PCR was negative on D6 or D7.  
10

11  
12 189  
13  
14 190 Secondary cases were identified in 10 classes. The number of secondary cases in each class were  
15  
16 191 one (n=8 classes), three (n=1 class) and four (n=1 class). Overall, four secondary cases had a  
17  
18 192 positive RADT, including three asymptomatic students and one symptomatic student who tested  
19  
20 193 positive by RADT and PCR on D12, with symptoms starting on D9 after last contact with the  
21  
22 194 positive classmate – a community exposure was also suspected. No tertiary case occurred.  
23  
24

25  
26 195 Outbreaks were limited to the classroom bubble and to school friends seen outside of school. When  
27  
28 196 the source was known, 37/57 cases (72.5%) were secondary to household transmission, 13 (25%)  
29  
30 197 to intra-school transmission and one to community contacts between students in the same school.  
31  
32

33 198  
34  
35 199 During the same period, outbreaks declared in other Montreal schools had a lower proportion of  
36  
37 200 asymptomatic cases (31.8%) compared to ESCL (55.6%) and PSNM (85.7%) (Supplementary  
38  
39 201 Appendix B).  
40  
41

42 202  
43

44 203 **Discussion**  
45

46  
47 204 RADTs were purchased in many countries as an additional tool to prevent outbreaks. However,  
48  
49 205 their use is limited by the paucity of evidence regarding their performance in school-aged children  
50  
51 206 and their impact on allowing in-person schooling. In this study, we prospectively compared the  
52  
53 207 performance of a COVID-19 RADT to PCR for the purpose of limiting transmission of SARS-  
54  
55  
56  
57  
58  
59  
60

1  
2  
3 208 CoV-2 infection in a real-world setting in two high schools. In a context of low SARS-CoV-2  
4  
5 209 prevalence in school and higher prevalence in the community (5-7% test positivity in Montreal<sup>30</sup>),  
6  
7 210 we observed only seven false positive RADT during the 5-month study (all in asymptomatic  
8  
9 211 individuals) and the specificity of the RADT remained excellent in all circumstances (99.8 and  
10  
11 212 100%). However, the sensitivity was much lower, varying between 28.6% in asymptomatic to  
12  
13 213 83.3% in symptomatic students.  
14  
15  
16  
17 214

18  
19 215 A recent large observational study described the use of RADT in asymptomatic individuals as  
20  
21 216 beneficial, reporting a sensitivity of 64.4% (95% CI 58.3-70.2)<sup>31</sup>. However, as not all  
22  
23 217 asymptomatic individuals included had a confirmatory PCR, this could be overestimated. In our  
24  
25 218 study, only a few positive cases were detected by RADT (7/6358, 0.11% - students and staff  
26  
27 219 combined) in asymptomatic individuals who were randomly tested. Ten additional cases were  
28  
29 220 detected by PCR from gargle specimens. During the study, two full-time research assistants were  
30  
31 221 in each school, in addition to local school staff who were supporting the study rollout. This level  
32  
33 222 of required resources makes it difficult to justify the use of RADT for random screening of  
34  
35 223 asymptomatic individuals given its low sensitivity in that setting.  
36  
37  
38  
39  
40 224

41  
42 225 On the other hand, RADT detected SARS-CoV-2 positive symptomatic cases in 15 minutes,  
43  
44 226 allowing for prompt isolation, contact tracing, and testing – in collaboration with local public  
45  
46 227 health. In this study, the overall sensitivity of RADT in symptomatic individuals (students and  
47  
48 228 staff, combined) was 78.6% (95% CI 49.2-95.3). This finding is in agreement with other published  
49  
50 229 studies<sup>14, 15, 32-34</sup>. Sood et al. recently described that the positive concordance of RADT was higher  
51  
52 230 among symptomatic children (64.4%) compared to asymptomatic children (51.1%) presenting at  
53  
54  
55  
56  
57  
58  
59  
60

1  
2  
3 231 a walk-in testing site<sup>33</sup>. Similarly, L'Huillier et al. described a sensitivity of 73.0% in symptomatic  
4  
5 232 vs. 43.3% in asymptomatic children<sup>34</sup>. The authors described the peak of RADT sensitivity as high  
6  
7  
8 233 as 100% on D2 post symptoms onset, with a subsequent decrease to 56% by D5. In our study, 225  
9  
10 234 of 235 symptomatic children had recorded their date of symptoms onset, with a median time of  
11  
12 235 one day (range: 0-33 days). Overall, 46.7% (n=105/225) were tested with RADT and PCR on the  
13  
14 236 day of symptoms onset. Our reported RADT sensitivity may have been higher had students been  
15  
16  
17 237 tested on subsequent days. However, the usefulness of RADT is precisely to control outbreaks and  
18  
19 238 therefore delaying testing to enhance sensitivity would be counterproductive. This trade-off may  
20  
21 239 not apply to the delta variant, for which the kinetic of infection may differ<sup>35, 36</sup>.

22  
23  
24 240  
25  
26 241 RADT identified 28.6% of positive asymptomatic exposed school contacts, which was similar to  
27  
28 242 that recently described by Torres et al. for non-household significant contacts (sensitivity:  
29  
30 243 35.7%)<sup>37</sup>. Although this percentage is relatively low, the rapid diagnosis of SARS-CoV-2 infection  
31  
32 244 in exposed individuals allowed local public health to quickly manage these students' household  
33  
34  
35 245 contacts who, at the time, had to isolate until the result of the D3 testing. With changes in  
36  
37 246 quarantine recommendations for vaccinated family members, the benefit of RADT in this specific  
38  
39 247 population may be smaller. Of note, most positive cases in students, for which the source was  
40  
41 248 known were due to intrafamilial and household SARS-CoV-2 transmission. In many of these  
42  
43 249 instances, students were sent to school despite having a known positive contact. Active screening  
44  
45 250 of symptoms and history of significant contact with known positive cases should be reinforced to  
46  
47 251 prevent school outbreaks. Thirteen of 51 cases were acquired from school, with 15 cases belonging  
48  
49 252 to the same class bubble (in five classes overall). Therefore, the asymptomatic nature of this  
50  
51  
52  
53  
54  
55  
56  
57  
58  
59  
60

1  
2  
3 253 infection makes screening for school contacts essential. Our results demonstrate that using a more  
4  
5 254 sensitive method, such as PCR, may be more reliable for that purpose.  
6  
7  
8 255

9  
10 256 This study had several limitations. First, we did not collect socio-demographic and behavioral data,  
11  
12 257 including risk perception, adherence to public health measures, nor did we systematically  
13  
14 258 document individual contacts with positive cases occurring outside of school. However, for the  
15  
16 259 most part, we were able to identify when significant household transmission occurred and relied  
17  
18 260 on the transparency of participants and local public health. We cannot infer whether PCR positive  
19  
20 261 individuals were contagious. The study was performed before the advent of the delta variant in our  
21  
22 262 region. Because RADT detects the N protein, we expect that its sensitivity and specificity would  
23  
24 263 not be affected negatively, as viral loads of delta variant infections are reported to be higher<sup>35</sup>.  
25  
26 264 Finally, the sensitivity of RADT in symptomatic individuals was based on a relatively small  
27  
28 265 number (12 students and 2 staff members) of people with PCR-confirmed SARS-CoV-2 infections.  
29  
30  
31  
32

33 266  
34  
35 267 This is the largest study to date assessing the use of RADT in school settings. The strengths of this  
36  
37 268 study included its prospective design, as well as the real-world use of RADT in comparison to  
38  
39 269 PCR. We assigned participants to earlier versus standard return to school with serial RADT testing,  
40  
41 270 showing that there were no secondary outbreaks when allowing students to return to school after  
42  
43 271 a shorter quarantine. Although the current study was not powered to rule this out, this aligns with  
44  
45 272 other recently published data<sup>38</sup> and may allow policymakers to consider reducing the duration of  
46  
47 273 quarantine for exposed contacts, provided a PCR is negative on D6 or D7 following contact.  
48  
49  
50

51 274  
52  
53  
54  
55  
56  
57  
58  
59  
60

1  
2  
3 275 In conclusion, our findings contribute to the growing evidence that the use of RADT leads to rapid  
4  
5 276 diagnosis of SARS-CoV-2 infection in symptomatic individuals in schools<sup>39</sup>. However, RADT  
6  
7  
8 277 does not perform well as a screening tool in asymptomatic individuals. In our study, teenagers  
9  
10 278 were able to adequately proceed to self-collection of swabs, while supervised by a research  
11  
12 279 assistant. It may be helpful to reinforce policies for symptom screening when entering schools,  
13  
14 280 where symptomatic individuals, including students or staff could be tested with RADT on the spot.  
15  
16  
17 281 This would avoid subsequent significant exposures in class but would also allow students to attend  
18  
19 282 school if symptoms were due to other viruses. A negative RADT could still mean that symptoms  
20  
21 283 are due to SARS-CoV-2, but with a viral load too low to be detected and therefore less likely to  
22  
23  
24 284 transmit at that point. In such instance, a subsequent sample tested by PCR would be useful.  
25  
26  
27  
28  
29 286



## References

1. Hellewell J, Abbott S, Gimma A, et al. Feasibility of controlling COVID-19 outbreaks by isolation of cases and contacts. *Lancet Glob Health*. Apr 2020;8(4):e488-e496. doi:10.1016/S2214-109X(20)30074-7
2. Kretzschmar ME, Rozhnova G, Bootsma MCJ, van Boven M, van de Wijkert J, Bonten MJM. Impact of delays on effectiveness of contact tracing strategies for COVID-19: a modelling study. *Lancet Public Health*. Aug 2020;5(8):e452-e459. doi:10.1016/S2468-2667(20)30157-2
3. Azar MM, Landry ML. Detection of Influenza A and B Viruses and Respiratory Syncytial Virus by Use of Clinical Laboratory Improvement Amendments of 1988 (CLIA)-Waived Point-of-Care Assays: a Paradigm Shift to Molecular Tests. *J Clin Microbiol*. Jul 2018;56(7)doi:10.1128/JCM.00367-18
4. C AH, Caya C, Papenburg J. Rapid and simple molecular tests for the detection of respiratory syncytial virus: a review. *Expert Rev Mol Diagn*. Jul 2018;18(7):617-629. doi:10.1080/14737159.2018.1487293
5. Chartrand C, Tremblay N, Renaud C, Papenburg J. Diagnostic Accuracy of Rapid Antigen Detection Tests for Respiratory Syncytial Virus Infection: Systematic Review and Meta-analysis. *J Clin Microbiol*. Dec 2015;53(12):3738-49. doi:10.1128/JCM.01816-15
6. Papenburg J, Buckeridge DL, De Serres G, Boivin G. Host and viral factors affecting clinical performance of a rapid diagnostic test for respiratory syncytial virus in hospitalized children. *J Pediatr*. Sep 2013;163(3):911-3. doi:10.1016/j.jpeds.2013.03.067
7. Peeling RW, Olliaro PL, Boeras DI, Fongwen N. Scaling up COVID-19 rapid antigen tests: promises and challenges. *Lancet Infect Dis*. Feb 23 2021;doi:10.1016/S1473-3099(21)00048-7
8. Ma Z, Idris S, Zhang Y, et al. The impact of COVID-19 pandemic outbreak on education and mental health of Chinese children aged 7-15 years: an online survey. *BMC Pediatr*. Feb 24 2021;21(1):95. doi:10.1186/s12887-021-02550-1
9. Koirala A, Wood N, Macartney K. Testing for SARS-CoV-2 infection: a key strategy to keeping schools and universities open. *Lancet Child Adolesc Health*. Jun 2021;5(6):387-389. doi:10.1016/S2352-4642(21)00087-0
10. Engzell P, Frey A, Verhagen MD. Learning loss due to school closures during the COVID-19 pandemic. *Proc Natl Acad Sci U S A*. Apr 27 2021;118(17)doi:10.1073/pnas.2022376118
11. Learning during the pandemic: review of international research. Government of the United Kingdom. 12 July 2021. . <https://www.gov.uk/government/publications/learning-during-the-pandemic/learning-during-the-pandemic-review-of-international-research#authors> (Accessed 7-9-2021)
12. Centers for Disease Control and Prevention. Interim Guidance for Antigen Testing for SARS-CoV-2. <https://www.cdc.gov/coronavirus/2019-ncov/lab/resources/antigen-tests-guidelines.html> (Accessed 7-8-2021).
13. Government of Canada. Interim guidance on the use of rapid antigen detection tests for the identification of SARS-CoV-2 infection. <https://www.canada.ca/en/public-health/services/diseases/2019-novel-coronavirus-infection/guidance-documents/use-rapid-antigen-detection-tests.html> (accessed 7-8-2021).
14. Pickering S, Batra R, Merrick B, et al. Comparative performance of SARS-CoV-2 lateral flow antigen tests and association with detection of infectious virus in clinical specimens: a single-centre laboratory evaluation study. *Lancet Microbe*. Jun 30 2021;doi:10.1016/S2666-5247(21)00143-9

15. Wagenhauser I, Knies K, Rauschenberger V, et al. Clinical performance evaluation of SARS-CoV-2 rapid antigen testing in point of care usage in comparison to RT-qPCR. *EBioMedicine*. Jul 2021;69:103455. doi:10.1016/j.ebiom.2021.103455
16. Dinnes J, Deeks JJ, Berhane S, et al. Rapid, point-of-care antigen and molecular-based tests for diagnosis of SARS-CoV-2 infection. *Cochrane Database Syst Rev*. Mar 24 2021;3:CD013705. doi:10.1002/14651858.CD013705.pub2
17. Hayer J, Kasapic D, Zemmrch C. Real-world clinical performance of commercial SARS-CoV-2 rapid antigen tests in suspected COVID-19: A systematic meta-analysis of available data as of November 20, 2020. *Int J Infect Dis*. Jul 2021;108:592-602. doi:10.1016/j.ijid.2021.05.029
18. Mertens P, De Vos N, Martiny D, et al. Development and Potential Usefulness of the COVID-19 Ag Respi-Strip Diagnostic Assay in a Pandemic Context. *Front Med (Lausanne)*. 2020;7:225. doi:10.3389/fmed.2020.00225
19. Kawasuji H, Takegoshi Y, Kaneda M, et al. Transmissibility of COVID-19 depends on the viral load around onset in adult and symptomatic patients. *PLoS One*. 2020;15(12):e0243597. doi:10.1371/journal.pone.0243597
20. Shenoy S. SARS-CoV-2 (COVID-19), viral load and clinical outcomes; lessons learned one year into the pandemic: A systematic review. *World J Crit Care Med*. Jul 9 2021;10(4):132-150. doi:10.5492/wjccm.v10.i4.132
21. Brandolini M, Taddei F, Marino MM, et al. Correlating qRT-PCR, dPCR and Viral Titration for the Identification and Quantification of SARS-CoV-2: A New Approach for Infection Management. *Viruses*. May 28 2021;13(6)doi:10.3390/v13061022
22. Government of Canada. Interim guidance for the detection of SARS-CoV-2 with the Abbott Panbio COVID-19 antigen rapid test. <https://www.canada.ca/en/public-health/services/reports-publications/canada-communicable-disease-report-ccdr/monthly-issue/2021-47/issue-1-january-2021/interim-guidance-detection-sars-cov-2-abbott-panbio-antigen-rapid-test.html> (Accessed 7-8-2021).
23. Goldfarb DM, Tilley P, Al-Rawahi GN, et al. Self-Collected Saline Gargle Samples as an Alternative to Health Care Worker-Collected Nasopharyngeal Swabs for COVID-19 Diagnosis in Outpatients. *J Clin Microbiol*. Mar 19 2021;59(4)doi:10.1128/JCM.02427-20
24. Corman VM, Landt O, Kaiser M, et al. Detection of 2019 novel coronavirus (2019-nCoV) by real-time RT-PCR. *Euro Surveill*. Jan 2020;25(3)doi:10.2807/1560-7917.Es.2020.25.3.2000045
25. Benoit P, Labbe AC, Lalancette L, et al. Comparison of SARS-CoV-2 detection with the Cobas(R) 6800/8800 system on gargle samples using two sample processing methods with combined oropharyngeal/nasopharyngeal swab. *J Med Virol*. Jul 29 2021;doi:10.1002/jmv.27245
26. Dumaresq J, Coullée F, Dufresne PJ, et al. Natural spring water gargle and direct RT-PCR for the diagnosis of COVID-19 (COVID-SPRING study). *Journal of Clinical Virology*. 2021/11/01/ 2021;144:104995. doi:https://doi.org/10.1016/j.jcv.2021.104995
27. Paré SG, B-SJ, Fafard J. et al. Natural spring water gargle samples as an alternative to nasopharyngeal swabs for SARS-CoV-2 detection using a laboratory-developed test. *Submitted*. 2021;
28. Boutin CA, Grandjean-Lapierre S, Gagnon S, et al. Comparison of SARS-CoV-2 detection from combined nasopharyngeal/oropharyngeal swab samples by a laboratory-developed real-time RT-PCR test and the Roche SARS-CoV-2 assay on a cobas 8800 instrument. *J Clin Virol*. Nov 2020;132:104615. doi:10.1016/j.jcv.2020.104615

- 1  
2  
3 29. Phillips B, Browne DT, Anand M, Bauch CT. Model-based projections for COVID-19  
4 outbreak size and student-days lost to closure in Ontario childcare centres and primary schools.  
5 *Sci Rep*. Mar 18 2021;11(1):6402. doi:10.1038/s41598-021-85302-6  
6  
7 30. Government of Québec. Situation of COVID-19 in Montreal. .  
8 [https://santemontreal.qc.ca/en/public/coronavirus-covid-19/situation-of-the-coronavirus-covid-](https://santemontreal.qc.ca/en/public/coronavirus-covid-19/situation-of-the-coronavirus-covid-19-in-montreal/)  
9 [19-in-montreal/](https://santemontreal.qc.ca/en/public/coronavirus-covid-19/situation-of-the-coronavirus-covid-19-in-montreal/) (Accessed 4-10-2021)  
10  
11 31. Wachinger J, Olaru ID, Horner S, Schnitzler P, Heeg K, Denkinger CM. The potential of  
12 SARS-CoV-2 antigen-detection tests in the screening of asymptomatic persons. *Clin Microbiol*  
13 *Infect*. Jul 26 2021;doi:10.1016/j.cmi.2021.07.020  
14  
15 32. Mockel M, Corman VM, Stegemann MS, et al. SARS-CoV-2 antigen rapid immunoassay  
16 for diagnosis of COVID-19 in the emergency department. *Biomarkers*. May 2021;26(3):213-220.  
17 doi:10.1080/1354750X.2021.1876769  
18  
19 33. Sood N, Shetgiri R, Rodriguez A, et al. Evaluation of the Abbott BinaxNOW rapid antigen  
20 test for SARS-CoV-2 infection in children: Implications for screening in a school setting. *PLoS*  
21 *One*. 2021;16(4):e0249710. doi:10.1371/journal.pone.0249710  
22  
23 34. L'Huillier AG, Lacour M, Sadiku D, et al. Diagnostic accuracy of SARS-CoV-2 rapid  
24 antigen detection testing in symptomatic and asymptomatic children in the clinical setting. *J Clin*  
25 *Microbiol*. Jun 30 2021;JCM0099121. doi:10.1128/JCM.00991-21  
26  
27 35. Bolze A, Cirulli ET, Luo S, et al. SARS-CoV-2 variant Delta rapidly displaced variant  
28 Alpha in the United States and led to higher viral loads. *medRxiv*. 2021:2021.06.20.21259195.  
29 doi:10.1101/2021.06.20.21259195  
30  
31 36. Li B, Deng A, Li K, et al. Viral infection and transmission in a large, well-traced outbreak  
32 caused by the SARS-CoV-2 Delta variant. *medRxiv*. 2021:2021.07.07.21260122.  
33 doi:10.1101/2021.07.07.21260122  
34  
35 37. Torres I, Poujois S, Albert E, Colomina J, Navarro D. Evaluation of a rapid antigen test  
36 (Panbio COVID-19 Ag rapid test device) for SARS-CoV-2 detection in asymptomatic close  
37 contacts of COVID-19 patients. *Clin Microbiol Infect*. Apr 2021;27(4):636 e1-636 e4.  
38 doi:10.1016/j.cmi.2020.12.022  
39  
40 38. Nelson EJ, McKune SL, Ryan KA, et al. SARS-CoV-2 Positivity on or After 9 Days  
41 Among Quarantined Student Contacts of Confirmed Cases. *JAMA*. Apr 20 2021;325(15):1561-  
42 1562. doi:10.1001/jama.2021.2392  
43  
44 39. Ciaranello A, Goehringer C, Nelson SB, Ruark LJ, Pollock NR. Lessons Learned From  
45 Implementation of SARS-CoV-2 Screening in K-12 Public Schools in Massachusetts. *Open*  
46 *Forum Infect Dis*. Aug 2021;8(8):ofab287. doi:10.1093/ofid/ofab287  
47  
48  
49  
50  
51  
52  
53  
54  
55  
56  
57  
58  
59  
60

1  
2  
3  
4  
5  
6  
7  
8  
9  
10  
11  
12  
13  
14  
15  
16  
17  
18  
19  
20  
21  
22  
23  
24  
25  
26  
27  
28  
29  
30  
31  
32  
33  
34  
35  
36  
37  
38  
39  
40  
41  
42  
43  
44  
45  
46  
47

**Table 1. Performance of RADT in the different participant groups**

| RADT (nasal)                                                                          | RESULTS      |      |             |     | CLINICAL PERFORMANCE OF RADT |                         |                     |
|---------------------------------------------------------------------------------------|--------------|------|-------------|-----|------------------------------|-------------------------|---------------------|
|                                                                                       | PCR (gargle) |      |             |     | Sensitivity                  |                         | Specificity         |
|                                                                                       | POS          | NEG  | EQ/Weak POS | INV | Excluding EQ/Weak POS        | Including EQ / Weak POS |                     |
| <i>Asymptomatic students*</i>                                                         |              |      |             |     |                              |                         |                     |
| POS                                                                                   | 7            | 1    | 0           | 0   | 41.2%                        | 26.9%                   | 100%†               |
| NEG                                                                                   | 10           | 5549 | 9           | 7   | (95% CI 21.6-64.0)           | (95% CI= 13.7-46.1)     | (95% CI 99.9-100)   |
| INV                                                                                   | 0            | 0    | 0           | 0   | (n=17)                       | (n=26)                  |                     |
| <i>Asymptomatic students considered exposed contacts of positive index cases‡</i>     |              |      |             |     |                              |                         |                     |
| POS                                                                                   | 4            | 6    | 0           | 0   | 28.6%                        | 26.7%                   | 99.6%               |
| NEG                                                                                   | 10           | 1470 | 1           | 0   | (95% CI 8.4-58.1)            | (95% CI 7.8-55.1)       | (95% CI 99.1-99.9)  |
| INV                                                                                   | 0            | 0    | 0           | 0   | (n=14)                       | (n=15)                  |                     |
| <i>Symptomatic students§</i>                                                          |              |      |             |     |                              |                         |                     |
| POS                                                                                   | 10           | 0    | 0           | 0   | 83.3%                        | N/A                     | 100.0%              |
| NEG                                                                                   | 2            | 224  | 0           | 0   | (95% CI 51.6-97.9)           |                         | (95% CI 98.4-100.0) |
| INV                                                                                   | 0            | 0    | 0           | 0   |                              |                         |                     |
| <i>Asymptomatic staff members</i>                                                     |              |      |             |     |                              |                         |                     |
| POS                                                                                   | 0            | 1    | 0           | 0   |                              |                         | 99.8%               |
| NEG                                                                                   | 0            | 775  | 0           | 0   | N/A                          | N/A                     | (95% CI 99.3-100.0) |
| INV                                                                                   | 0            | 0    | 0           | 0   |                              |                         |                     |
| <i>Asymptomatic staff members considered exposed contacts of positive index cases</i> |              |      |             |     |                              |                         |                     |
| POS                                                                                   | 0            | 0    | 0           | 0   |                              |                         | 100.0%              |
| NEG                                                                                   | 0            | 61   | 0           | 0   | N/A                          | N/A                     | (95% CI 94.1-100.0) |
| INV                                                                                   | 0            | 0    | 0           | 0   |                              |                         |                     |
| <i>Symptomatic staff members</i>                                                      |              |      |             |     |                              |                         |                     |
| POS                                                                                   | 1            | 0    | 0           | 0   | 50.0%                        | N/A                     | 100.0%              |
| NEG                                                                                   | 1            | 62   | 0           | 0   | (95% CI 1.3-98.7)            |                         | (95% CI 94.3-100.0) |
| INV                                                                                   | 0            | 0    | 0           | 0   |                              |                         |                     |

RADT: rapid antigen detection test, PCR: polymerase chain reaction, POS: positive, NEG: negative, INV: invalid, EQ: equivocal, CI: confidence interval; N/A: non-applicable

\* Prevalence of SARS CoV-2 infection, based on PCR results (including equivocal and weakly positive results): 0.30% (95% CI 0.18-0.49)

†The specificity of RADT in asymptomatic students was 99.98% when adjusted to two decimal places

‡ Prevalence of SARS CoV-2 infection, based on PCR results (including equivocal and weakly positive results): 0.7% (95% CI 0.5-1.6)

§ Prevalence of SARS CoV-2 infection, based on PCR results (including equivocal and weakly positive results): 5.1% (95% CI 2.65-8.71)

1  
2  
3  
4  
5  
6  
7  
8  
9  
10  
11  
12  
13  
14  
15  
16  
17  
18  
19  
20  
21  
22  
23  
24  
25  
26  
27  
28  
29  
30  
31  
32  
33  
34  
35  
36  
37  
38  
39  
40  
41  
42  
43  
44  
45  
46  
47  
48  
49  
50  
51  
52  
53  
54  
55  
56  
57  
58  
59  
60

**Figure 1: Proportion of participating students per class and level**

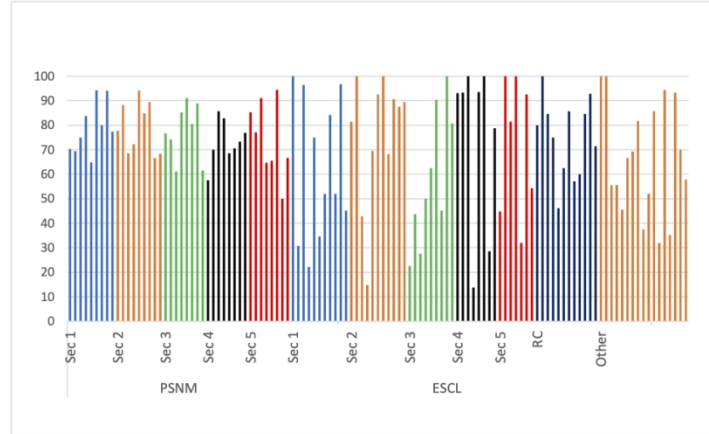

Sec: Secondary; RC: Reception class; PSNM: Pensionnat du Saint-Nom-de-Marie; ESCL : École Secondaire Calixa-Lavallée.

Sec: Secondary; RC: Reception class; PSNM: Pensionnat du Saint-Nom-de-Marie; ESCL : École Secondaire Calixa-Lavallée.

431x558mm (72 x 72 DPI)

### *Supplementary Appendix A : Sample size calculation*

As the school populations were fixed in size, we determined the precision with which we would be able to estimate our primary outcome. Given the non-linear nature of the epidemic process and the complexity of the quarantine and testing policies proposed, it was not possible to estimate precision through a direct calculation. We therefore implemented an agent-based model (ABM) to estimate through simulations the number of tests that would be performed, the likely results of the tests, and other outcomes of interest in planning the study (e.g. number of days in school, number of secondary infections). We implemented a variation of a previously described school-based ABM to adapt the characteristics of the school<sup>29</sup>. For simplicity, we did not model household transmission explicitly, although we did allow for infection outside of the school. We also extended the model to include testing and quarantine, and we simulated random testing of students, routine testing of teachers, testing of symptomatic students and teachers and the first quarantine policy where a full 14-day quarantine was imposed for a class in which any student or teacher received a positive test (RADT or PCR). Based on the mean across 100 simulation runs for 182 days each, with an estimated sensitivity (compared to PCR) of the RADT of 0.41 (IQR: 0.39 – 0.42) as compared to the true (i.e., modelled) sensitivity of 0.40 and an estimated specificity of POC test of 0.99 (IQR: 0.99 – 0.99) as compared to the true specificity of 0.98, we expected that the number of infections and tests would be sufficient in one single school to estimate the accuracy of RADT with acceptable precision. An additional school was added to support generalizability of the findings, as well as to allow exploration of the secondary objectives.

1  
2  
3 ***Supplementary Appendix B: Comparison of outbreaks to other high schools in Montreal using***  
4 ***public health data during the same period***  
5

6 Data from Montréal Public Health showed that in other Montréal high schools (n=177), a range of  
7 1 to 16 exposures and outbreaks per school (median: 1; IQR: 2) were observed during the study  
8 period, for a total of 358 outbreaks, one affecting two different schools. Schools declared that 1 to  
9 52 cases (median: 4; IQR 5) were linked to an outbreak, for a total of 1181 cases. A range of 1 to  
10 25 classes (median: 2, IQR: 3) were involved in outbreaks (n=161), for a total of 447 classes.  
11 Outbreaks at ESCL and PSNM comprised, on average, 3 and 2 cases, respectively. ESCL and  
12 PSNM had three outbreaks, with nine and seven students involved, from four and two groups,  
13 respectively, during the same period.  
14  
15  
16  
17  
18  
19  
20  
21  
22  
23  
24  
25  
26

27 Despite active surveillance of SARS-CoV-2 infection through this study, there was no difference  
28 in outbreaks observed between participating schools and the rest of the Montréal high schools.  
29 However, outbreaks declared in other schools had a lower proportion of asymptomatic cases  
30 (31.8%) compared to ESCL (55.6%) and PSNM (85.7%). Participating schools had a lower  
31 proportion of cases linked to an outbreak present in school while contagious (28.6% and 6.7%),  
32 compared to the average in other schools of Montréal (n=241; 36.5%). Interestingly, data showed  
33 that 66.0% of cases linked to an outbreak in other high schools tested positive or started their  
34 symptoms within seven days of their first exposure (Supplementary Figure). Furthermore, 51.0%  
35 of the 741 cases linked to an outbreak who went to school while contagious were only processed  
36 by the Public Health team, due to capacity, after the recommended first testing date.  
37  
38  
39  
40  
41  
42  
43  
44  
45  
46  
47  
48  
49  
50  
51

52 Using the number of classes where an outbreak occurred, assuming on average that one student is  
53 in class while contagious, we estimated that 50,010 high school students were isolated during the  
54  
55  
56  
57  
58  
59  
60

1  
2  
3  
4  
5  
6  
7  
8  
9  
10  
11  
12  
13  
14  
15  
16  
17  
18  
19  
20  
21  
22  
23  
24  
25  
26  
27  
28  
29  
30  
31  
32  
33  
34  
35  
36  
37  
38  
39  
40  
41  
42  
43  
44  
45  
46  
47  
48  
49  
50  
51  
52  
53  
54  
55  
56  
57  
58  
59  
60

study period in other high schools which, with 14 days of isolation, leads to an estimated 700,140 days or ~1,918 years of cumulative isolation. A safe, accelerated return to school could have possibly saved an estimated 350,070 days or ~959 years of cumulative isolation (Supplementary Table).

Confidential



1  
2  
3  
4  
5  
6  
7  
8  
9  
10  
11  
12  
13  
14  
15  
16  
17  
18  
19  
20  
21  
22  
23  
24  
25  
26  
27  
28  
29  
30  
31  
32  
33  
34  
35  
36  
37  
38  
39  
40  
41  
42  
43  
44  
45  
46  
47  
48  
49  
50  
51  
52  
53  
54  
55  
56  
57  
58  
59  
60

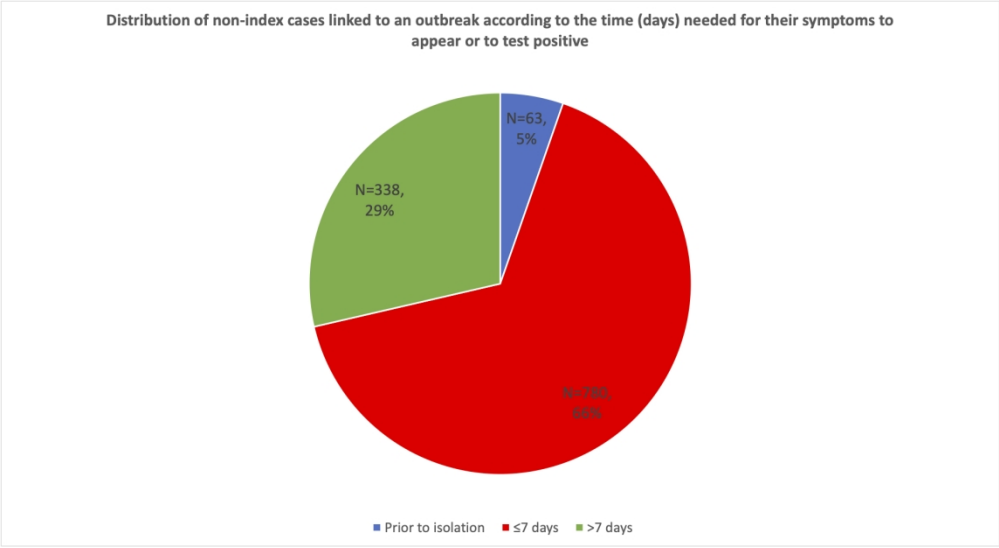

664x364mm (72 x 72 DPI)

1  
2  
3  
4  
5  
6  
7  
8  
9  
10  
11  
12  
13  
14  
15  
16  
17  
18  
19  
20  
21  
22  
23  
24  
25  
26  
27  
28  
29  
30  
31  
32  
33  
34  
35  
36  
37  
38  
39  
40  
41  
42  
43  
44  
45  
46  
47

**Supplementary Table. Predicted days of isolation**

| <i>January 25 to June 10 2021</i> | <i>Average students per group</i> | <i>Groups</i> | <i>Total students put in isolation (instances)</i> | <i>Days of isolation (14 days)</i> | <i>Days of isolation (7 days)</i> |
|-----------------------------------|-----------------------------------|---------------|----------------------------------------------------|------------------------------------|-----------------------------------|
| <i>High school</i>                | 30                                | 1667          | 50010                                              | 700140                             | 350070                            |

Confidential
